# Supplementary material for: A method for identifying the cause of inefficient salt-doping in organic semiconductors
Source: Royal Society of Chemistry journal article supplement (doi:10.1039/d1tc06062g), 2022-01-01
Supplement: d1tc06062g1.pdf [file d1tc06062g1.pdf]

Electronic Supporting Information

—  
**A method for identifying the cause of inefficient  
salt-doping in organic semiconductors**

A. Rahimi Chatri,<sup>a</sup> J. Liu,<sup>a</sup> F. Jahani,<sup>a,b</sup> L. Qiu,<sup>a,b,c</sup> R. C. Chiechi,<sup>a,b</sup> J. C. Hummelen<sup>a,b</sup> and  
L. J. A. Koster<sup>\*a</sup>

<sup>a</sup> *Zernike institute for Advanced Materials, University of Groningen, Nijenborgh 4, 9747 AG Groningen,  
The Netherlands.*

<sup>b</sup> *Stratingh Institute for Chemistry, University of Groningen, Nijenborgh 4, 9747 AG Groningen, The  
Netherlands.*

<sup>c</sup> *Present address: Yunnan Key Laboratory for Micro/Nano Materials & Technology, National Center for  
International Research on Photoelectric and Energy Materials, School of Materials and Energy, Yunnan  
University, Kunming 650091, P. R. China.*

\*Email: l.j.a.koster@rug.nl

## List of Figures

|    |                                                                                                                                                                                                                        |   |
|----|------------------------------------------------------------------------------------------------------------------------------------------------------------------------------------------------------------------------|---|
| S1 | Voltage sweep used in the simulations. . . . .                                                                                                                                                                         | 4 |
| S2 | Current-voltage characteristic of PTEG-1, n-doped with TBAF and TMAF, before (solid lines) and after (dotted lines) application of long duration bias stress. The voltage sweep rate is $4 \text{ V s}^{-1}$ . . . . . | 4 |
| S3 | Current-voltage characteristic of PTEG-1, n-doped with TBAI and TBABF <sub>4</sub> , a) before, and b) after the application of a long duration bias voltage. The voltage sweep rate is $4 \text{ V s}^{-1}$ . . . . . | 5 |
| S4 | Current-voltage characteristics of the n-doped devices, 44 days after application of long duration bias voltage, in logarithmic and linear scale. . . . .                                                              | 6 |

# 1 Numerical procedures

We use a transient drift-diffusion program to simulate the time-voltage-current characteristics of a doped layer. The simulation code is open-source<sup>(1)</sup> and is available on GitHub.<sup>(2)</sup> The main simulation parameters are listed in Table S1. Figure S1 shows how the voltage is varied over time. The voltage is ramped up from 0 V to 6 V in 1 ms and held there for 100 s followed by a decrease back to 0 V in 1ms.

The simulation solves the transient development of the potential  $V(x)$ , electron density  $n(x)$ , and the ionic densities  $n_{\text{ion}}(x)$  and  $p_{\text{ion}}(x)$ . The Poisson equation relates the potential  $V(x)$  to the charge density

$$\frac{\partial}{\partial x} \left( \varepsilon \frac{\partial V(x)}{\partial x} \right) = q(n(x) + n_{\text{ion}}(x) - p_{\text{ion}}(x)). \quad (1)$$

where  $\varepsilon$  is the dielectric constant.

The ionic and electron current densities are solved from the drift-diffusion equations, then one has for electrons

$$J_n(x) = -qn(x)\mu_n(x) \frac{\partial V(x)}{\partial x} + kT\mu_n(x) \frac{\partial n(x)}{\partial x}, \quad (2)$$

and for positive ions, one has

$$J_{p_{\text{ion}}}(x) = -qp_{\text{ion}}(x)\mu_{p_{\text{ion}}}(x) \frac{\partial V(x)}{\partial x} - kT\mu_{p_{\text{ion}}}(x) \frac{\partial p_{\text{ion}}(x)}{\partial x}, \quad (3)$$

where  $\mu_{p_{\text{ion}}}$  is the ion mobility. For negative ions, we have

$$J_{n_{\text{ion}}}(x) = -qn_{\text{ion}}(x)\mu_{n_{\text{ion}}}(x) \frac{\partial V(x)}{\partial x} + kT\mu_{n_{\text{ion}}}(x) \frac{\partial n_{\text{ion}}(x)}{\partial x}. \quad (4)$$

The total current density is then given by

$$J(x) = J_n(x) + J_D(x) + J_{n_{\text{ion}}}(x) + J_{p_{\text{ion}}}(x), \quad (5)$$

where  $J_D(x)$  is the displacement current.

The boundary condition on the potential  $V$  is given by

$$V(L) - V(0) = V_a, \quad (6)$$

where  $L$  is the thickness of the layer and  $V_a$  is the applied voltage. For the electron densities, we have the requirement that

$$n(0) = n(L) = N_c \exp(-\phi/kT), \quad (7)$$

where  $N_c$  is the effective density of states and  $\phi$  is the injection barrier. The boundary condition on the ionic densities is set by requiring that no ions can enter or leave the layer through the electrodes.

Table S1: Parameters used in the transient drift-diffusion simulations.

| parameter                    | value                               |
|------------------------------|-------------------------------------|
| device thickness             | 3000 nm                             |
| relative dielectric constant | 4                                   |
| effective density-of-states  | $2.5 \times 10^{25} \text{ m}^{-3}$ |
| electron mobility            | $10^{-7} \text{ m}^2/\text{Vs}$     |
| injection barrier            | 0.2 eV                              |
| ion concentration            | $10^{22} \text{ m}^{-3}$            |
| ion mobility (high)          | $10^{-13} \text{ m}^2/\text{Vs}$    |
| ion mobility (low)           | $10^{-18} \text{ m}^2/\text{Vs}$    |

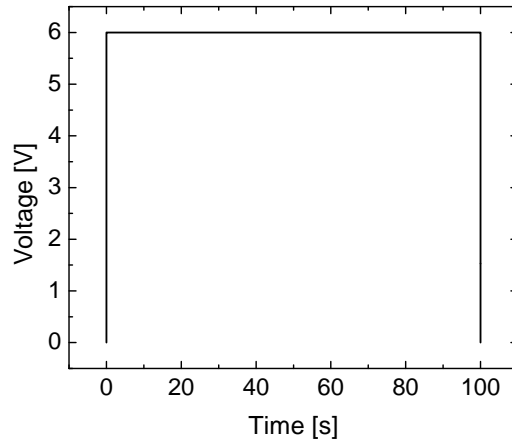

Figure S1: Voltage sweep used in the simulations.

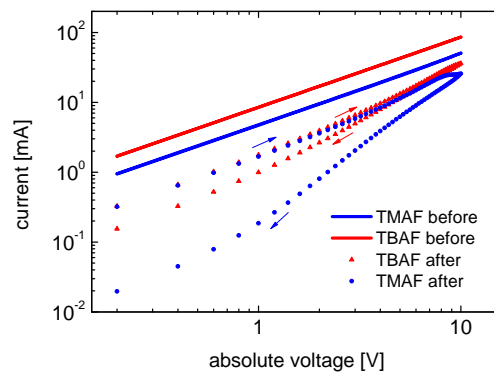

Figure S2: Current- voltage characteristic of PTEG-1, n-doped with TBAF and TMAF, before (solid lines) and after (dotted lines) application of long duration bias stress. The voltage sweep rate is  $4 \text{ Vs}^{-1}$ .

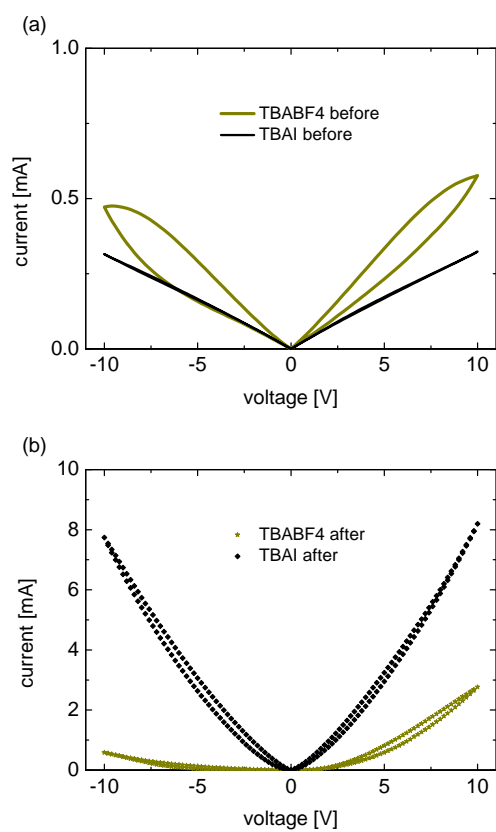

Figure S3: Current-voltage characteristic of PTEG-1, n-doped with TBAI and TBABF<sub>4</sub>, a) before, and b) after the application of a long duration bias voltage. The voltage sweep rate is 4 Vs<sup>-1</sup>.

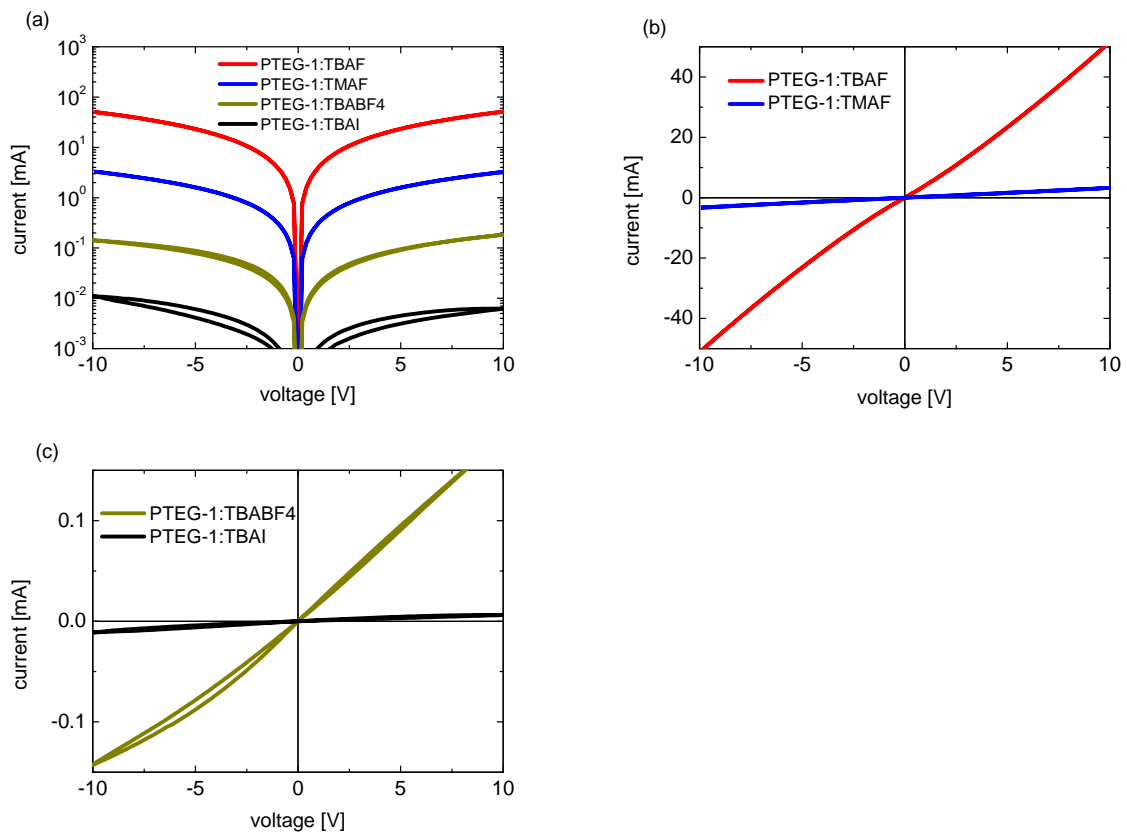

Figure S4: Current-voltage characteristics of the n-doped devices, 44 days after application of long duration bias voltage, in logarithmic and linear scale.

## 2 Experimental results

### References

- [1] M. Koopmans, V. M. Le Corre and L. J. A. Koster, *J. Open Source Softw.*, 2022, 7, 3727.
- [2] *SIMsalabim*, 2021, <https://github.com/kostergroup/SIMsalabim>.
